# Supplementary material for: Molecular Analysis of the Cold Tolerant Antarctic Nematode, Panagrolaimus davidi
Source: PubMed Central journal article supplement (PMC4123951; doi:10.1371/journal.pone.0104526), 2014-08-06

# *P. davidi* LEA-I

## LEA-1.1

MDSTND  
 SSP<sup>T</sup>LAEIAAE  
 AAHNIAEKAQN  
 VAAAARDKLAD AYEAVAE  
 YAHDGKEKAED  
 LAEAGKEKAED  
 LG<sup>E</sup>SVKESAQN AAEKVVD  
 LAHDGKEKVVD  
 LA<sup>Q</sup>AGKEKAED  
 LA<sup>Q</sup>AGKEKAQH ASDKAKD  
 LAHDGKEKAED  
 LGERAKEK<sup>S</sup>HD  
 LAEAGKEK<sup>A</sup>QR A<sup>S</sup>EKAKD  
 VAQSGKEK<sup>A</sup>HD  
 LAESGKQKANE  
 LGDRAKEK<sup>A</sup>DH ASDKAKD  
 LA<sup>Q</sup>AGKEKAHD  
 LAQAGKEKAQH ASDKAKD  
 LAQDGKEKAQE  
 LG<sup>D</sup>RS<sup>K</sup>ENAHH *ASNKAKE*  
*LANRGNEKAQE*  
*LGDHAKKASH* ASDKAKE  
 LANRGN<sup>A</sup>KAQE  
 LGDRAKEKAES NK\*

AE QD  
 L DAGKEKA ASDKAK<sup>D</sup>  
 GQ EE E  
 E E E  
 ØØ XØK KØXD  
 Q Q Q

## LEA-1.2

MDSTND  
 SSP<sup>T</sup>LAEIAAE  
 AAHNIAEKAQN  
 VAAAARDKLAD AYEAVAE  
 YAHDGKEKAED  
 LAEAGKEKAED  
 LG<sup>A</sup>SVKESAQN AAEKVVD  
 LAHDGKEKVVD  
 LA<sup>Q</sup>AGKEKAED  
 LAEAGKEK<sup>V</sup>QH ASDKAKD  
 LAHDGKEKAED  
 LGERAKEK<sup>S</sup>HD  
 LAEAGKEK<sup>A</sup>QR A<sup>T</sup>EKAKD  
 VAQSGKEK<sup>A</sup>HD  
 LAESGKQKANE  
 LGDRAKEK<sup>A</sup>DH ASDKAKD  
 LA<sup>H</sup>AGKEKAHD  
 LAQAGKEKAQH ASDKAKD  
 LAQDGKEKAQE  
 LG<sup>D</sup>RS<sup>K</sup>ENAHH ASNKAKE  
 LANRGNEKAQE  
 LGDHAKKASH ASDKAKE  
 LANRGN<sup>A</sup>KAQE  
 LGDRAKEKAES NK\*

AE QD  
 L DAGKEKA ASDKAK<sup>D</sup>  
 GQ EE E  
 E E E  
 ØØ XØK KØXD  
 Q Q Q

## LEA-1.3

MDSTND  
 SSP<sup>T</sup>LAEIAAE  
 AAHNIAEKAQN  
 VAAAARDKLAD AYEAVAE  
 YAHDGKEKAED  
 LAEAGKEKAEG  
 LG<sup>E</sup>SVKESAQN AAEKVVD  
 LAHDGKEKVVD  
 LA<sup>Q</sup>AGKEKAED  
 LAEAGKEK<sup>V</sup>QH ASDKAKD  
 LAHDGKEKAED  
 LGERAKEK<sup>S</sup>HD  
 LAEAGKEK<sup>A</sup>QR A<sup>S</sup>EKAKD  
 VAQSGKEK<sup>A</sup>HD  
 LAESGKQKANE  
 LGDRAKEK<sup>A</sup>DH ASDKAKD  
 LA<sup>H</sup>AGKEKA<sup>H</sup>D  
 LA<sup>Q</sup>AGKEKAQH ASDKAKD  
 LAQDGKEKAQE  
 LG<sup>D</sup>RS<sup>K</sup>ENAHH ASNKAKE  
 LANRGNEKAQE  
 LGDHAKKASH ASDKAKE  
 LANRGN<sup>A</sup>KAQE  
 LGDRAKEKAES NK\*

AE QD  
 L DAGKEKA ASDKAK<sup>D</sup>  
 GQ EE E  
 E E E  
 ØØ XØK KØXD  
 Q Q Q

# *P. davidi* *lea-1* cDNA sequences

```

                101                                     150
LEA1.1  AAGTGTAAAA GAAAGTGCCC AAAATGCTGC TGAAAAGGTT AAAGATCTTG
LEA1.2  AAGTGTAAAA GAAAGTGCCC AAAATGCTGC TGAAAAGGTT AAAGATCTTG
LEA1.3  AAGTGTAAAA GAAAGTGCCC AAAATGCTGC TGAAAAGGTT AAAGATCTTG
        S  V  K   E  S  A  Q   N  A  A   E  K  V   K  D  L  A

                151                                     200
LEA1.1  CACATGATGG TAAAGAAAAG GTTAAAGATC TTGCTCAAGC TGGAAAAGAA
LEA1.2  CACATGATGG TAAAGAAAAG GTTAAAGATC TTGCACAAGC TGGAAAAGAA
LEA1.3  CACATGATGG TAAAGAAAAG GTTAAAGATC TTGCTCAAGC TGGAAAAGAA
        H  D  G   K  E  K   V  K  D  L   A  Q  A   G  K  E

                201                                     250
LEA1.1  AAAGCCGAAG ATCTTGCTCA AGCTGGAAAG GAAAAAGCCC AACATGCTTC
LEA1.2  AAAGCCGAAG ATCTTGCTGA AGCTGGAAAG GAAAAAGTTC AACATGCTTC
LEA1.3  AAAGCCGAAG ATCTCGCTGA AGCTGGAAAG GAAAAAGTTC AACATGCTTC
        K  A  E  D   L  A  E   A  G  K   E  K  V  Q   H  A  S
                        (Q)                               (A)

                251                                     300
LEA1.1  TGATAAAGCA AAAGATCTTG CACATGATGG TAAAGAAAAG GCTGAAGATC
LEA1.2  TGATAAAGCA AAAGATCTTG CACATGATGG TAAAGAAAAG GCTGAAGATC
LEA1.3  TGATAAAGCA AAAGATCTTG CACATGATGG TAAAGAAAAG GCTGAAGATC
        D  K  A   K  D  L  A   H  D  G   K  E  K   A  E  D  L

                301                                     350
LEA1.1  TTGGAGAACG TGCAAAAGAA AAGTTCATG ATCTTGCTGA AGCTGGAAAA
LEA1.2  TTGGAGAACG TGCAAAAGAA AAGTCCCATG ATCTTGCTGA AGCTGGAAAA
LEA1.3  TTGGAGAACG TGCAAAAGAA AAGTTCATG ATCTTGCTGA AGCTGGAAAA
        G  E  R   A  K  E   K  S  H  D   L  A  E   A  G  K
```

# *P. davidi lea-1* genome sequence

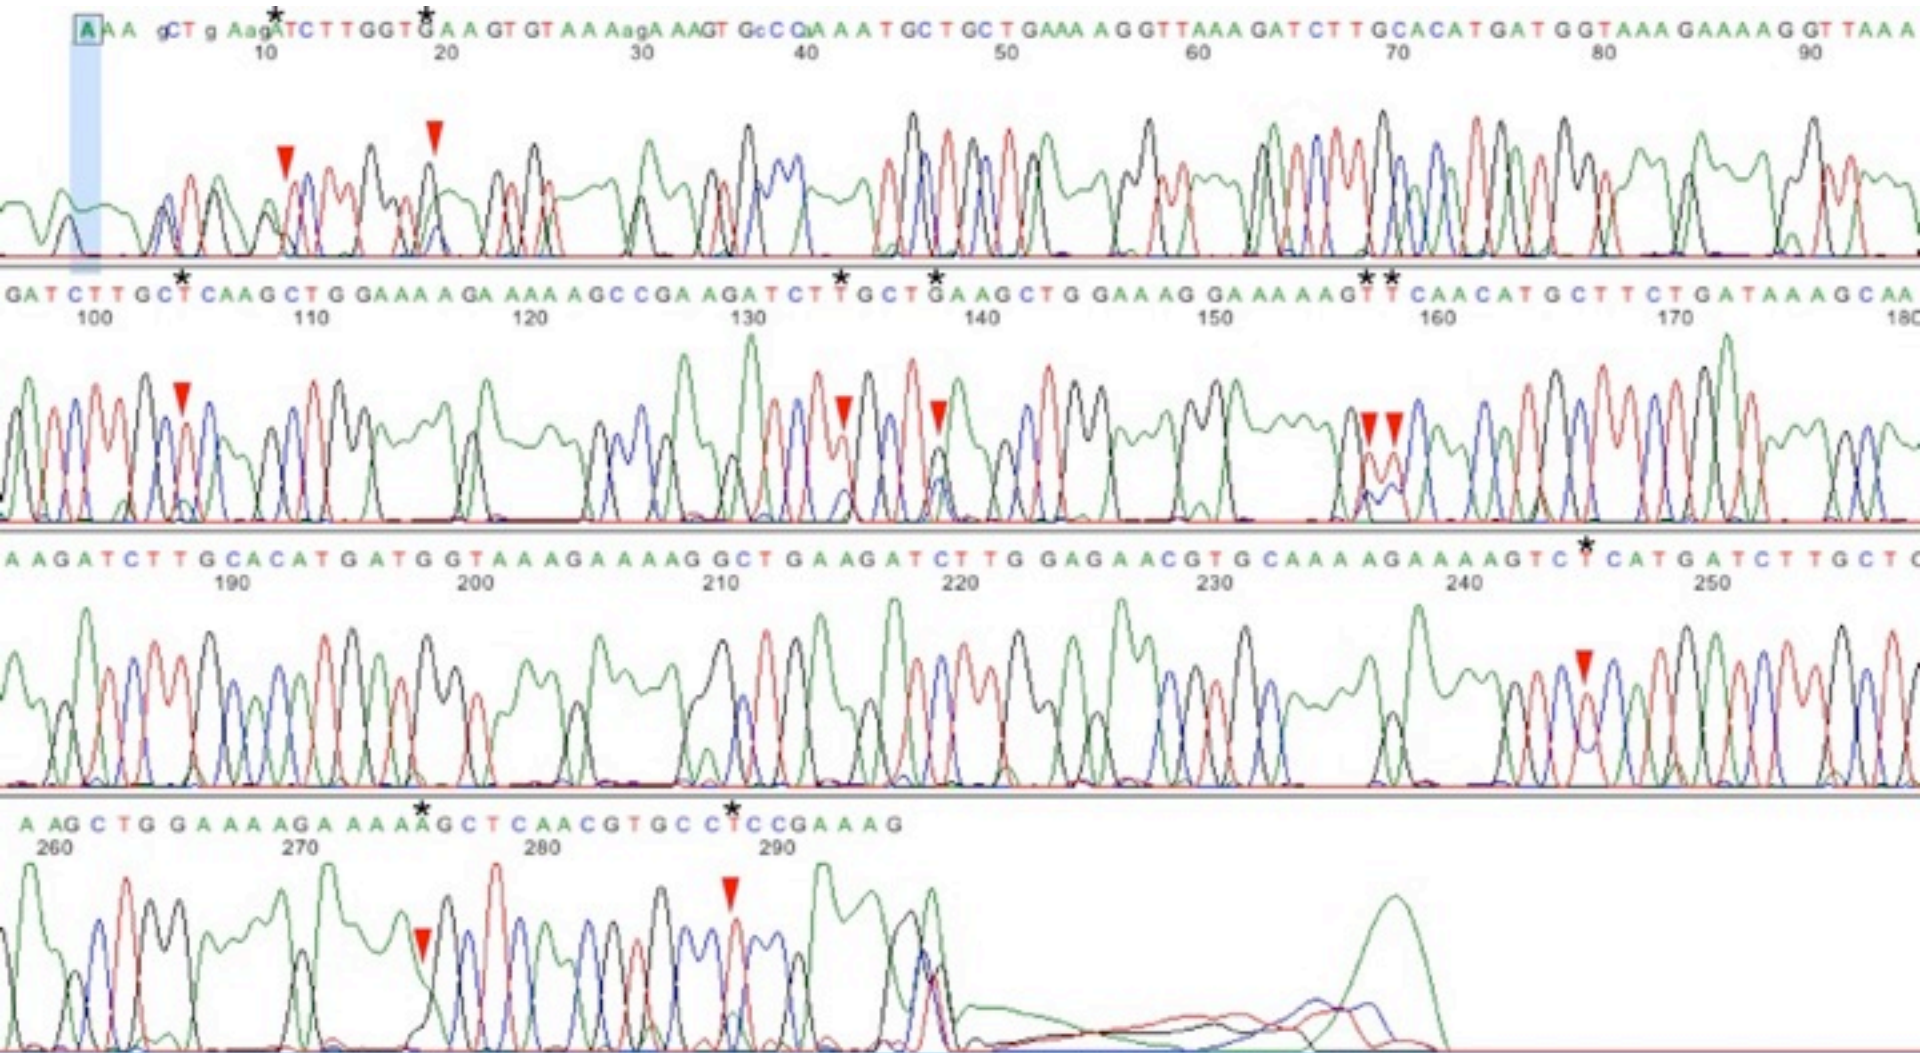

# *P. davidi lea-1* genome sequences

|               |                   |                   |                   |                   |                   |
|---------------|-------------------|-------------------|-------------------|-------------------|-------------------|
|               | 101               |                   |                   |                   | 150               |
| LEA1.1        | AAGTGTAAAA        | GAAAGTGCCC        | AAAATGCTGC        | TGAAAAGGTT        | AAAGATCTTG        |
| LEA1.2        | AAGTGTAAAA        | GAAAGTGCCC        | AAAATGCTGC        | TGAAAAGGTT        | AAAGATCTTG        |
| LEA1.3        | AAGTGTAAAA        | GAAAGTGCCC        | AAAATGCTGC        | TGAAAAGGTT        | AAAGATCTTG        |
| <b>lea-1F</b> | <b>AAGTGTAAAA</b> | <b>GAAAGTGCCC</b> | <b>AAAATGCTGC</b> | <b>TGAAAAGGTT</b> | <b>AAAGATCTTG</b> |
|               | 151               |                   |                   |                   | 200               |
| LEA1.1        | CACATGATGG        | TAAAGAAAAG        | GTTAAAGATC        | TTGCTCAAGC        | TGGAAAAGAA        |
| LEA1.2        | CACATGATGG        | TAAAGAAAAG        | GTTAAAGATC        | TTGCACAAGC        | TGGAAAAGAA        |
| LEA1.3        | CACATGATGG        | TAAAGAAAAG        | GTTAAAGATC        | TTGCTCAAGC        | TGGAAAAGAA        |
| <b>lea-1F</b> | <b>CACATGATGG</b> | <b>TAAAGAAAAG</b> | <b>GTTAAAGATC</b> | <b>TTGCWCAAGC</b> | <b>TGGAAAAGAA</b> |
|               | 201               |                   |                   |                   | 250               |
| LEA1.1        | AAAGCCGAAG        | ATCTTGCTCA        | AGCTGGAAAG        | GAAAAAGCCC        | AACATGCTTC        |
| LEA1.2        | AAAGCCGAAG        | ATCTTGCTGA        | AGCTGGAAAG        | GAAAAAGTTC        | AACATGCTTC        |
| LEA1.3        | AAAGCCGAAG        | ATCTCGCTGA        | AGCTGGAAAG        | GAAAAAGTTC        | AACATGCTTC        |
| <b>lea-1F</b> | <b>AAAGCCGAAG</b> | <b>ATCTYGCTSA</b> | <b>AGCTGGAAAG</b> | <b>GAAAAAGYIC</b> | <b>AACATGCTTC</b> |
|               | 251               |                   |                   |                   | 300               |
| LEA1.1        | TGATAAAGCA        | AAAGATCTTG        | CACATGATGG        | TAAAGAAAAG        | GCTGAAGATC        |
| LEA1.2        | TGATAAAGCA        | AAAGATCTTG        | CACATGATGG        | TAAAGAAAAG        | GCTGAAGATC        |
| LEA1.3        | TGATAAAGCA        | AAAGATCTTG        | CACATGATGG        | TAAAGAAAAG        | GCTGAAGATC        |
| <b>lea-1F</b> | <b>TGATAAAGCA</b> | <b>AAAGATCTTG</b> | <b>CACATGATGG</b> | <b>TAAAGAAAAG</b> | <b>GCTGAAGATC</b> |
|               | 301               |                   |                   |                   | 350               |
| LEA1.1        | TTGGAGAACG        | TGCAAAGAA         | AAGTCCATG         | ATCTTGCTGA        | AGCTGGAAAA        |
| LEA1.2        | TTGGAGAACG        | TGCAAAGAA         | AAGTCCCATG        | ATCTTGCTGA        | AGCTGGAAAA        |
| LEA1.3        | TTGGAGAACG        | TGCAAAGAA         | AAGTCCATG         | ATCTTGCTGA        | AGCTGGAAAA        |
| <b>lea-1F</b> | <b>TTGGAGAACG</b> | <b>TGCAAAGAA</b>  | <b>AAGTCYCATG</b> | <b>ATCTTGCTGA</b> | <b>AGCTGGAAAA</b> |



# cDNA alignment (cluster 257)

*gln-5, glutamine synthetase (carbamoyl-phosphatase)*

131 140 150 160 170 180 190 200 210 220 230 240 250 260

01N16 CACRATTTGATGATGGACGACGATCTTCAAGATAGCCCTTTCCATCAGTACCAACTTGACGAGGAAATTCGACAGAACATGATCGATCAGCAATACCCCATGTAATTTATCARCAGATGAGTTTCATG  
 06E21 CACRATTTGACGATGGACGACGATCTTCAAGATAGCCCTTTCCATCAGTACCAACTTGACGAGGAAATTCGACAGAACATGATCGATCAGCAATACCCCATGTAATTTATCARCAGATGATGTTTCATG  
 13P01 CACRATTTGACGATGGACGACGATCTTCAAGATAGCCCTTTCCATCAGTACCAACTTGACGAGGAAATTCGACAGAACATGATCGATCAGCAATACCCCATGTAATTTATCARCAGATGATGTTTCATG  
 33D02 CACRATTTGACGATGGACGACGATCTTCAAGATAGCCCTTTCCATCAGTACCAACTTGACGAGGAAATTCGACAGAACATGATCGATCAGCAATACCCCATGTAATTTATCARCAGATGATGTTTCATG  
 04C02 CACRATTTGATGATGGACGACGATCTTCAAGATAGCCCTTTCCATCAGTACCAACTTGACGAGGAAATTCGACAGAACATGATCGATCAGCAATACCCCATGTAATTTATCARCAGATGAGTTTCATG  
 05F02 CACRATTTGATGATGGACGACGATCTTCAAGATAGCCCTTTCCATCAGTACCAACTTGACGAGGAAATTCGACAGAACATGATCGATCAGCAATACCCCATGTAATTTATCARCAGATGAGTTTCATG  
 14E08 CACRATTTGATGATGGACGACGATCTTCAAGATAGCCCTTTCCATCAGTACCAACTTGACGAGGAAATTCGACAGAACATGATCGATCAGCAATACCCCATGTAATTTATCARCAGATGATGTTTCATG  
 42D07 CACRATTTGACGATGGACGACGATCTTCAAGATAGCCCTTTCCATCAGTACCAACTTGACGAGGAAATTCGACAGAACATGATCGATCAGCAATACCCCATGTAATTTATCARCAGATGATGTTTCATG  
 Consensus CACRATTTGALGATGGACGACGATCTTCAAGATAGCCCTTTCCATCAGTACCAACTTGACGAGGAAATTCGACAGAACATGATCGATCAGCAATACCCCATGTAATTTATCARCAGATGALGTTTCATG

•••••

521 530 540 550 560 570 580 590 600 610 620 630 640 650

01N16 ATARTTGATCAGCCCATTTCAATTCCTTTACATATACCAATTTGAARTTCCCATTTGTGCTGGAGTTACTTCAGCATTGTACCAGCAAGCTTTAAACAGCTAATAAACATGCATTTGCATGTGCTTGTAC  
 06E21 ATARTTGATCAGCCCATTTCAATTCCTTTACATATACCAATTTGAARTTCCCATTTGTGCTGGAGTTACTTCAGCATTGTACCAGCAAGCTTTAAACAGCTAATAAACATGCATTTGCATGTGCTTGTAC  
 13P01 ATARTTGATCAGCCCATTTCAATTCCTTTACATATACCAATTTGAARTTCCCATTTGTGCTGGAGTTACTTCAGCATTGTACCAGCAAGCTTTAAACAGCTAATAAACATGCATTTGCATGTGCTTGTAC  
 33D02 ATARTTGATCAGCCCATTTCAATTCCTTTACATATACCAATTTGAARTTCCCATTTGTGCTGGAGTTACTTCAGCATTGTACCAGCAAGCTTTAAACAGCTAATAAACATGCATTTGCATGTGCTTGTAC  
 04C02 ATARTTGATCAGCCCATTTCAATTCCTTTACATATACCAATTTGAARTTCCCATTTGTGCTGGAGTTACTTCAGCATTGTACCAGCAAGCTTTAAACAGCTAATAAACATGCATTTGCATGGCTTGTAC  
 05F02 ATARTTGATCAGCCCATTTCAATTCCTTTACATATACCAATTTGAARTTCCCATTTGTGCTGGAGTTACTTCAGCATTGTACCAGCAAGCTTTAAACAGCTAATAAACATGCATTTGCATGGCTTGTAC  
 14E08 ATARTTGATCAGCCCATTTCAATTCCTTTACATATACCAATTTGAARTTCCCATTTGTGCTGGAGTTACTTCAGCATTGTACCAGCAAGCTTTAAACAGCTAATAAACATGCATTTGCATGTGCTTGTAC  
 42D07 ATARTTGATCAGCCCATTTCAATTCCTTTACATATACCAATTTGAARTTCCCATTTGTGCTGGAGTTACTTCAGCATTGTACCAGCAAGCTTTAAACAGCTAATAAACATGCATTTGCATGTGCTTGTAC  
 Consensus ATARTTGATCAGCCCATTTCAATTCCTTTACATATACCAATTTGAARTTCCCATTTGTGCTGGAGTTACTTCAGCATTGTACCAGCAAGCTTTAAACAGCTAATAAACATGCATTTGCATGTGCTTGTAC

651 660 670 680 690 700 710 720 730 740 750 760 770 780

01N16 AATTTCTCTTCCATACATTCGATCTGCAACCACCCACATAATATGGCCTTGTGGAGGTGGAGTTTATCCTTTGGCCACCAGTGGTGGAGATCCATATCCAAAAGAGATATTCCTTGTCCATA  
 06E21 AATTTCTCTTCCATACATTCGATCTGCAACCACCCACATAATATGGCCTTGTGGAGGTGGAGTTTATCCTTTGGCCACCAGTGGTGGAGATCCATATCCAAAAGAGATATTCCTTGTCCATA  
 13P01 AATTTCTCTTCCATACATTCGATCTGCAACCACCCACATAATATGGCCTTGTGGAGGTGGAGTTTATCCTTTGGCCACCAGTGGTGGAGATCCATATCCAAAAGAGATATTCCTTGTCCATA  
 33D02 AATTTCTCTTCCATACATTCGATCTGCAACCACCCACATAATATGGCCTTGTGGAGGTGGAGTTTATCCTTTGGCCACCAGTGGTGGAGATCCATATCCAAAAGAGATATTCCTTGTCCATA  
 04C02 AATTTCTCTTCCATACATTCGATCTGCAACCACCCACATAATATGGCCTTGTGGAGGTGGAGTTTATCCTTTGGCCACCAGTGGTGGAGATCCATATCCAAAAGAGATATTCCTTGTCCATA  
 05F02 AATTTCTCTTCCATACATTCGATCTGCAACCACCCACATAATATGGCCTTGTGGAGGTGGAGTTTATCCTTTGGCCACCAGTGGTGGAGATCCATATCCAAAAGAGATATTCCTTGTCCATA  
 14E08 AATTTCTCTTCCATACATTCGATCTGCAACCACCCACATAATATGGCCTTGTGGAGGTGGAGTTTATCCTTTGGCCACCAGTGGTGGAGATCCATATCCAAAAGAGATATTCCTTGTCCATA  
 42D07 AATTTCTCTTCCATACATTCGATCTGCAACCACCCACATAATATGGCCTTGTGGAGGTGGAGTTTATCCTTTGGCCACCAGTGGTGGAGATCCATATCCAAAAGAGATATTCCTTGTCCATA  
 Consensus AATTTCTCTTCCATACATTCGATCTGCAACCACCCACATAATATGGCCTTGTGGAGGTGGAGTTTATCCTTTGGCCACCAGTGGTGGAGATCCATATCCAAAAGAGATATTCCTTGTCCATA



# cDNA alignment (cluster 259)

## T25B9.9 6-phosphogluconate dehydrogenase

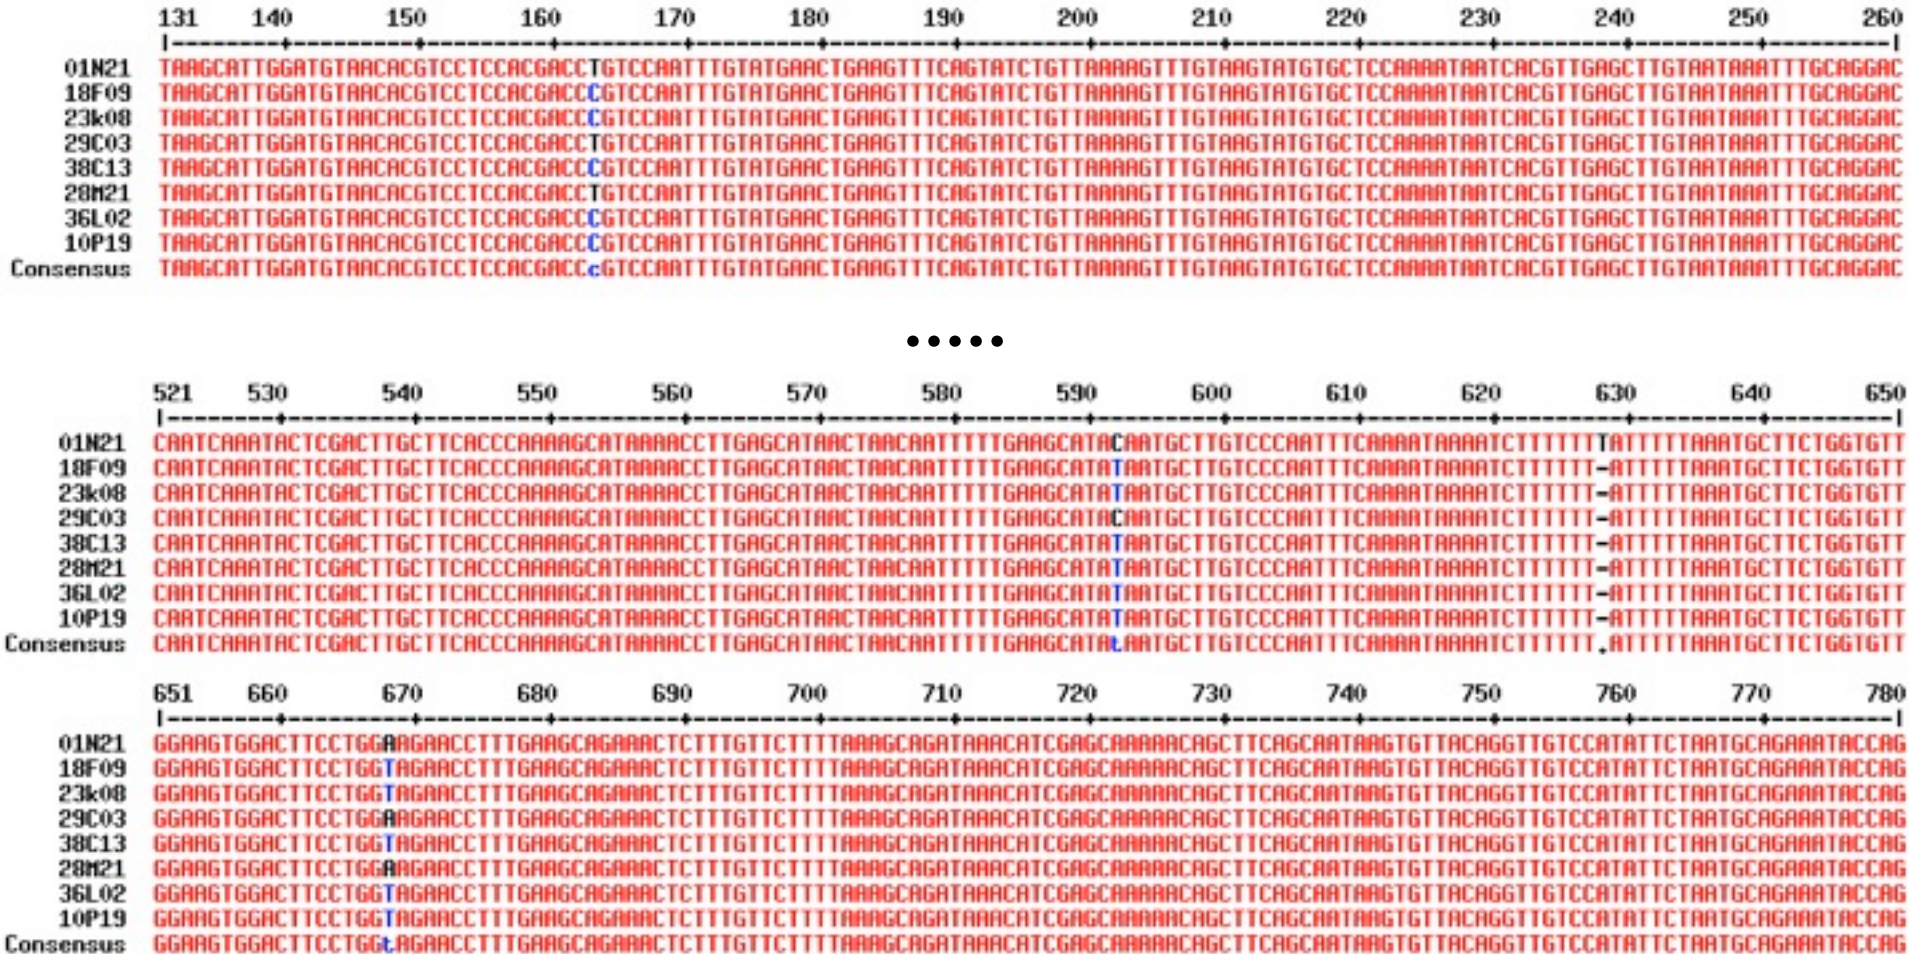

Supplement: pone.0104526.s005.pdf [file pone.0104526.s005.pdf]
