# Supplementary material for: Molecular Analysis of the Cold Tolerant Antarctic Nematode, Panagrolaimus davidi
Source: PubMed Central journal article supplement (PMC4123951; doi:10.1371/journal.pone.0104526), 2014-08-06
Supplement: pone.0104526.s001.pdf [file pone.0104526.s001.pdf]

**Supplementary Table S1** The resulting number of transcripts above certain lengths resulting from the choice of different kmer sizes on the Illumina data for the transcriptome by soapdenovo.

| <b>kmer</b> | <b>largest</b> | <b># &gt; 100</b> | <b># &gt; 200</b> | <b># &gt; 500</b> |
|-------------|----------------|-------------------|-------------------|-------------------|
| 19          | 1,465          | 77,267            | 7,356             | 112               |
| 21          | 1,755          | 118,014           | 21,350            | 850               |
| 23          | 1,721          | 132,829           | 27,663            | 1,385             |
| 29          | 2,497          | 175,320           | 34,237            | 2,088             |
| 39          | 2,886          | 211,691           | 46,675            | 3,380             |
| 41          | 3,223          | 216,531           | 49,917            | 3,610             |
| 47          | 3,176          | 221,660           | 62,016            | 5,154             |
| 49          | 3,912          | 219,760           | 66,324            | 5,760             |
| 51          | 4,432          | 504,589           | 70,629            | 6,318             |
| 53          | 3,430          | 494,214           | 74,291            | 6,586             |
| 55          | 3,482          | 467,647           | 77,268            | 6,768             |
| 57          | 3,482          | 434,161           | 80,435            | 7,009             |
| 59          | 3,482          | 400,984           | 83,088            | 7,189             |
| 61          | 3,482          | 365,864           | 85,197            | 7,528             |
| 69          | 3,016          | 234,165           | 86,314            | 7,674             |
| 71          | 3,466          | 209,703           | 82,498            | 7,647             |
| 79          | 3,194          | 116,842           | 61,793            | 6,828             |
| 81          | 2,725          | 98,050            | 55,079            | 6,368             |
| 89          | 2,223          | 34,594            | 25,230            | 3,366             |
| 93          | 1,903          | 13,085            | 10,202            | 1,303             |
