# Supplementary material for: Molecular Analysis of the Cold Tolerant Antarctic Nematode, Panagrolaimus davidi
Source: PubMed Central journal article supplement (PMC4123951; doi:10.1371/journal.pone.0104526), 2014-08-06
Supplement: pone.0104526.s003.pdf [file pone.0104526.s003.pdf]

PDT

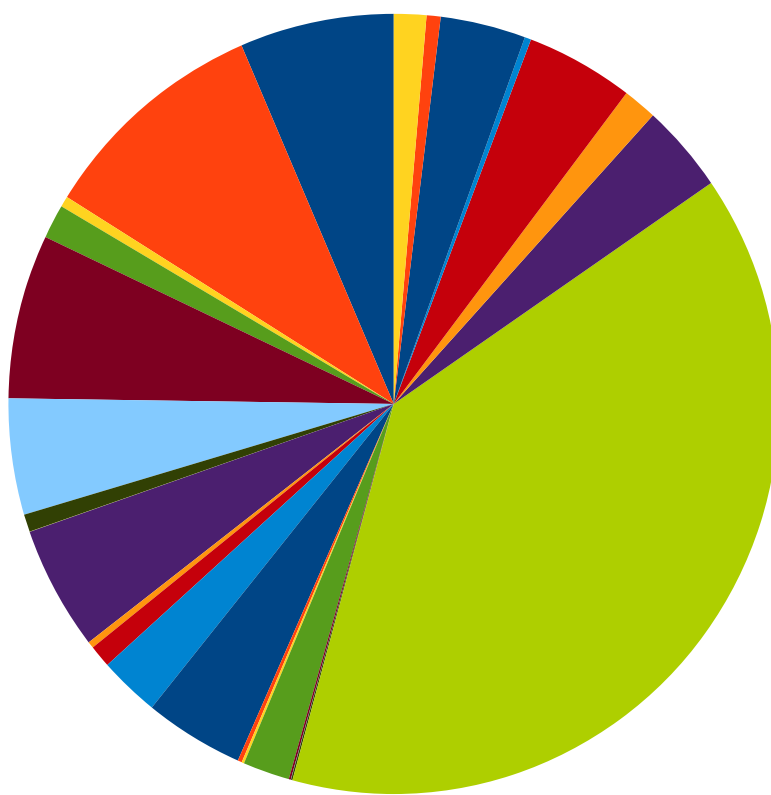

PDF

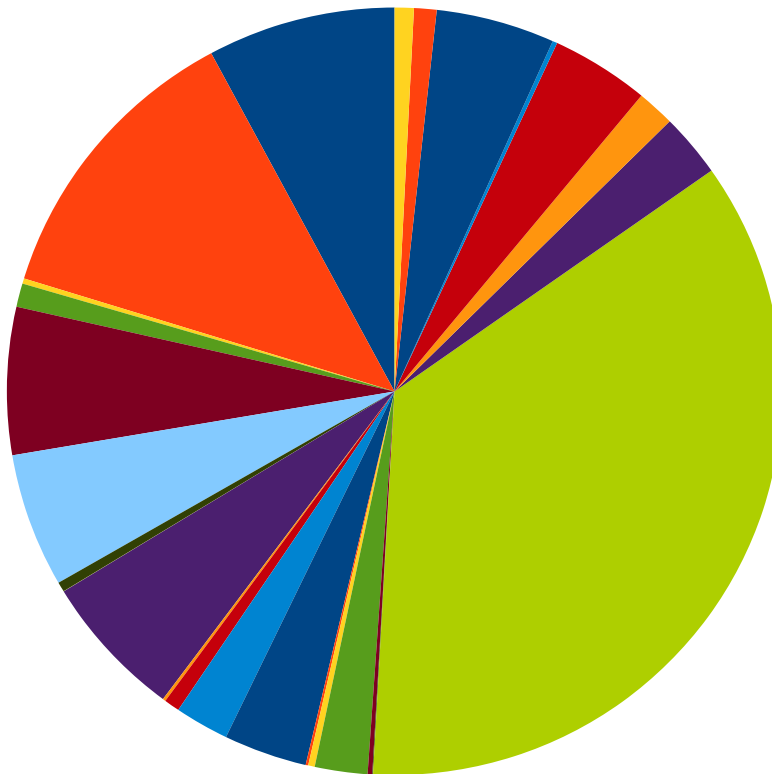

- |                                                                                                                         |                                                                                                                                      |
|-------------------------------------------------------------------------------------------------------------------------|--------------------------------------------------------------------------------------------------------------------------------------|
|  Amino Acids and Derivatives         |  Carbohydrates                                    |
|  Cell Division and Cell Cycle        |  Cell Wall and Capsule                            |
|  Clustering-based Subsystems         |  Cofactors, Vitamins, Prosthetic Groups, Pigments |
|  DNA Metabolism                      |  Dormancy and Sporulation                         |
|  Fatty Acids, Lipids, and Isprenoids |  Iron Acquisition and Metabolism                  |
|  Membrane Transport                  |  Metabolism of Aromatic Compounds                 |
|  Miscellaneous                       |  Motility and Chemotaxis                          |
|  Nitrogen Metabolism                 |  Nucleosides and Nucleotides                      |
|  Phosphorous Metabolism              |  Photosynthesis                                   |
|  Potassium Metabolism                |  Protein Metabolism                               |
|  RNA Metabolism                      |  Regulation and Cell Signaling                    |
|  Respiration                         |  Secondary Metabolism                             |
|  Stress Response                     |  Sulfur Metabolism                                |
|  Virulence, Disease and Defense      |                                                                                                                                      |
