# Supplementary material for: Molecular Analysis of the Cold Tolerant Antarctic Nematode, Panagrolaimus davidi
Source: PubMed Central journal article supplement (PMC4123951; doi:10.1371/journal.pone.0104526), 2014-08-06

*P. davidi* intron size distribution

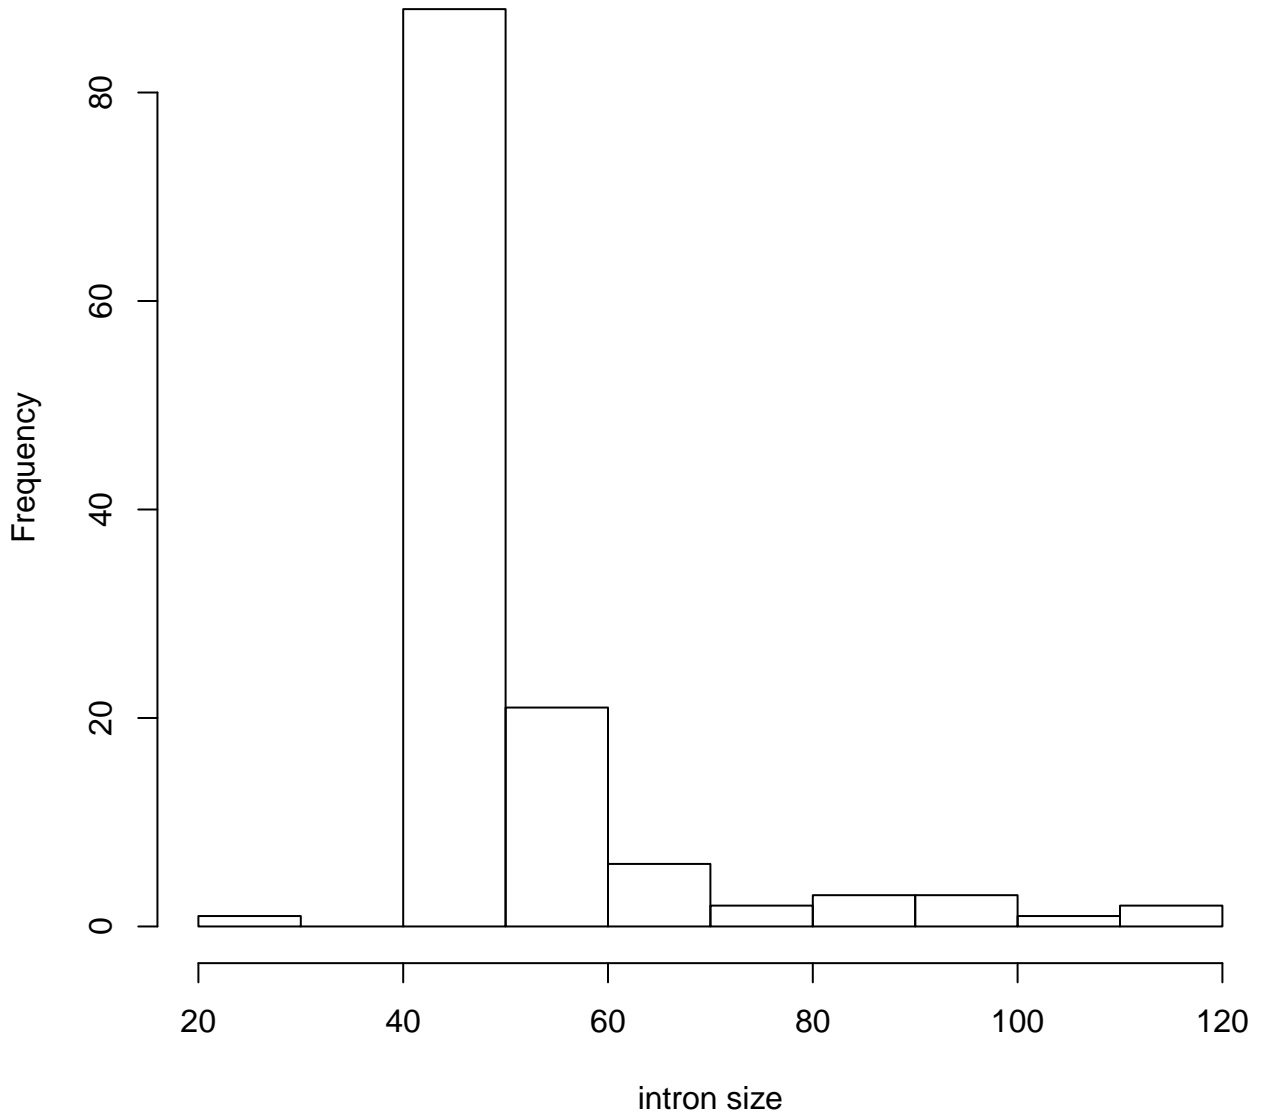

Supplement: pone.0104526.s006.pdf [file pone.0104526.s006.pdf]
