# Supplementary material for: Molecular Analysis of the Cold Tolerant Antarctic Nematode, Panagrolaimus davidi
Source: PubMed Central journal article supplement (PMC4123951; doi:10.1371/journal.pone.0104526), 2014-08-06
Supplement: pone.0104526.s007.pdf [file pone.0104526.s007.pdf]

Cd-hit clusters of the LEA transcripts:

>Cluster 0

0 502aa, >PdU002998\_v1.1... at 100%  
1 593aa, >PdU053999\_v1.1... at 82%  
2 1002aa, >PDT19L04... \*

>Cluster 1

0 339aa, >PdU001599\_v1.1... at 99%  
1 594aa, >PDT20F06... \*

>Cluster 2

0 272aa, >PdU010487\_v1.1... at 100%  
1 207aa, >PdU017016\_v1.1... at 96%  
2 593aa, >PDT30I10... \*

>Cluster 3

0 320aa, >PDT06A14... \*

>Cluster 4

0 307aa, >PdU055885\_v1.1... at 89%  
1 288aa, >PDF06F09... at 95%  
2 317aa, >PDF40F19... \*  
3 306aa, >PDF16M17... at 99%  
4 201aa, >PDF82L15... at 94%

>Cluster 5

0 240aa, >PdU015612\_v1.1... at 91%  
1 119aa, >PdU017506\_v1.1... at 89%  
2 282aa, >PDF80K07... \*

>Cluster 6

0 235aa, >PdU055084\_v1.1... \*  
1 235aa, >PDT10D20... at 99%

>Cluster 7

0 209aa, >PDF96E03... \*

>Cluster 8

0 169aa, >PdU013001\_v1.1... \*

>Cluster 9

0 150aa, >PdU014555\_v1.1... \*

>Cluster 10

0 90aa, >PDF39E07... at 82%  
1 98aa, >PDT45G14... \*

>Cluster 11

0 78aa, >PDF77N04... \*

>Cluster 12

0 54aa, >PDT56F11... \*

Sequences:

>PdU013001\_v1.1

MAGITENVKEMLNTVAEKSSEFKDYATGEELRNPSDTSMDISDAKDKASEIADAADKDKASD  
LADAASNKASEVKDAASNKASEMKDAASSKASDLSDKASEMKDAAADKASEMYEGAKQ  
KASDLGAAKVKADEMTSQETKDAARDMADKAGSKLEDAGHKIREQKDAI

>PdU055084\_v1.1

MSTEKSYTETVQDAITAREKIIETAEAVKEKAAELATAAAGETLGLTSEEAKDKVDDVKDQ  
AKEKASEVADAAGKKLDSAKEQVKDKVDETKQKASKAADAAGEKLESAKEHVKDKVGE  
AEEKMDDGPELKGNHPPADKMSGGVRIARKKRPSESARHEHGNQEENAASGSADEDEEAP  
STTEIAVQKQEKKLQQNFQEDAVKSYHEKPMPTHQPDHGYHSGRAHKDPAFQPKKQ

>PdU014555\_v1.1

MPTLYKKVGPLSTTFDSLMSDNEDKTLGEKAKDAIANAAEAVKEAATDLKNKIVGEKSTE  
EKAADKVKDAADAAADKIGDMKDSANNAGDKIKEAATDLKNKVVGKSTEDKVADKVK  
DAADAAADKVGEMKESARDGAHKAGDKLKDA

>PDF40F19

MDSTNDSSPTLAEIAAEAAHNIAEKAQNVA AAAARDKLADAYEAVAEYAHDGKEKAEDLAE  
AGKEKAEDLGASVKESAQNAAEKVKDLAHDGKEKVKDLAQAGKEKAEDLAEAGKEKVK  
HASKAKDLAHDGKEKAEDLGERAKEKSHDLAEAGKEKAQRATEKAKDVAQSGKEKAH  
DLAESGKQKANELGDRAKEKADHASDKAKDLAHAGKEKAHDLAQAGKEKAQHASKA  
KDLAQDGKEKAQELGDRSKENAHASNKAKELANRGNKAQELGDHAKEKASHASKA  
KELANRGNKAQELGDRAKEKAESNK

>PDF96E03

MLLKRLKILHMMVKKRLKILLKLEKKPKILLKLERKKPNMLLIKQKILHMMVKKRLKILE  
NVQKSHDLAEAGKEKAQRASEKAKDVAQSGKEKAHDLAESGKQKANELGDRAKEKAD  
HASKAKDLAQAGKEKAHDLAQAGKEKAQHASKAKDLAQDGKEKAQELGDRSKEKA  
SHASKAKELANRGNKAQELGDRAKEKAESNK

>PDT06A14

MNRKIITLCFIGLFALSAFADETVGDKVDEGIN KASSGVQDAADSVKEKAEEAKQRFRRDT  
VGDKLDQGLDSASQSVQNAADSVKDSAKDAKYKVG EALERKRRET VGDVDEKINDAS  
DSVQNAADSVKDKAEDAKQRMKRET VGDVDEGIN KASSGVQDAADSVKEKAEEAKQK  
RET VGDVDEKINDAKMTAEKAGESIKETGQELKQDRET V GAKINHGIDAASEKTQDAAE  
SVKDTAKDAKYKAGEAIDDAKEGGKTF FENVGETISNAAESVKKAVVNAKDAVVGSSSS  
ESHEEIATTMLIPRYRRHVAYSL

>PDF80K07

MNRKIITLCFIGLFALTAFADETVGDKVDEGIN KASSGVQDAADSVKEKAEEAKQRFRRDT  
VGDKLDQGLDSASQSVQNAADSVKDSAKDAKYKAGEAL ERKRRET VGNKVDEKINDAS  
DSVQNAADSVKEKAEEIKQKRET VGDVDEKINDAKMTAERAGESIKETGQELKQDRET V  
GSKINHGMDAASEKTQDAAESVKDTAKDAKYKAGEAIDDAKEGGKTF FENVGETISNAAE  
SVKKAVVNAKDAVVGSSSSSESHEEIATTMLIPRYRRHVAYSL

>PDT19L04

MLFYANANFVQKSWIHEQRTTKMFSKNLIFIAIAIFAITALADETVGDKVDQGINKAAGGVQ  
DAAQSVKDTAKDAQRMKRET VGDVDEKINAASESVQNAAGQAVKDKAEEMKQERKRR  
ETVGEKVDKINAASDAVQNAGEAVKEKGQEMKQERIKRET VGDVDEKINEASDSVQN  
AGQAVKDKAEEMKQERMRRRETETIGEKLDSTLNSAGDSIKSAGQSVKEKGQDIKDRKRRE  
TVGDVDEKINAASESVQNAAGQAVKDKAEEMKQERKRRET VGEKVDKINAASDAVQNA  
GEAVKEKGQEMKQERMRRRET VGDVDEGIN KAADGVQDAAQSVKDTAKDAQRMKRE  
TVGDVDEKINEASDSVQNAAGQAVKDKAEEMKQERLRRET VGDVDEKINQASDSVQAA  
GEKTKEMAKEAKQHKRETETIGEKLDSTLNSAGDSIKSAGQSVKEKGQDIKDRKRRET  
VGEKVDKINAASDAVQNAGEAVKEKGQEMKQERIKRET VGDVDEKINEASDSVQNA  
GAVKDKAEEMKQERMRRRETETIGEKLDSTLNSAGDSIKSAGQSVKEKGQDIKDRKRRET V  
GDVDEKINAASESVQNAAGQAVKDKAEEMKQERKRRET VGEKVDKINAASDAVQNAGE

AVKEKGQEMKQERMRRRETVGDKVDEGINKAADGVQDAAQSVKDTAKDAQQRMKRETV  
GDKVDEKINEASDSVQNAGQAVKDKAEEMKQERLRRETVGDKVDEKINQASDSVQAAGE  
KTKEMAKEAKQHKRETETIGEKL DSTLNSAGDSIKSAGQSVKEKGQDIKDRKRRETVGEK  
VDEKINAASDAVQNAGEAVKEKGQEMKQERKRRETVGEKVDEKINEASDSVQNAGQAVK  
DKAEEMKQERLRRETVGEKVDEKINAASDAVQEAGEAVKDKGEEMKQDRKRRETVGEK  
VDSGVSSARDTMTETGESIKQTGKNMQQDRKRRTILGSDIEQVNDIPVTQITPRHRRYVL  
>PDT30I10

MFSKNLIFIAIAIFTITACADETVGDKVDQGINKAAGGVQDAAQSVKDTAKDAQQRMKRET  
VGDKVDEKINAASESVQNAGQAVKDKAEEMKQERKRRETVGEKVDEKINAASDAVQNAG  
EAVKEKGQEMKQERIKRETVGDKVDEKINEASDSVQNAGQAVKDKAEEMKQERMRRRETE  
TIGEKL DSTLNSAGDSIKSAGQSVKEKGQDIKDRKRRETVGDKVDAKINAASDAVQNAGQ  
AVKDKAEEMKQERMRRRETVGDKVDEKINAASDAVQNAGEAVKEKGQEMKQERKRRETV  
GDKVDEKINQASDSVQAAGEKTKEMAKEAKQHKRETETIGEKL DSTLNSAGDSIKSAGQS  
VKEKGQDIKDRKRRETVGDKVDAKINAASESVQNAGQAVKDKAEEMKQERLRRETVGEK  
VDEKINAASDAVQNAGEAVKEKGQEMKQERKRRETVGDKVDEKINAASDAVQNAGEAVK  
EKGQEMKQERKRRETVGDKVDEKINAASDAVQEAGEAVKDKGEEMKQDRKRRETVGEK  
VDSGVSSARDTMTETGETIKQTGKNMQQDRKRRTILGSDIEQVNDIPVTQITPRHRRYVL  
>PDT20F06

MKTIFTFVLLCIGLTLAETIGQKLDATLDAVSESIGNAADVVEKTRGSKYTAADAVDKTK  
ETIGEAADIAQEYGGMAAEVAKEYGGVAYEKMAEYAAEASEIIRDNAGQFYDNMGKYVK  
DAAGNLRDHGGEIAYNAGKYVYDKTGNLLIDASEYVKDNGGNLLDKSGKIAYKAGEYVI  
NQANRVVSNAKDRAQEMASDASDYVKDNAGNLRKTSGEIAYKAGEYVIDKANKVVQNA  
KDSVSGTAEDAKNRAQEAL EDASQYVKDSMGNLKNKAGEIVYKAGEY AIDQKNKIVRQA  
SNAKDDAINRAQEAL EDASQYVKDSMGNLRNKKDEIVYKAGEYVVDQKNKIVRQASNAK  
DDAKNKAGKYAEDA KYRAQQA AEDASQYVKDKMGNLRDKSNNIVYKVNEYVIDSQNM  
VSRKADDAKSRAQELGEDLSQYVKDKKNNYLNKAGEIVYHAGQYVIDEKKNLIRKVS DQ  
ADDLGDYVRDAQGNLRDQAGNLIYKAGEQVKKR KASQMADQAGDYAEAARDAAGNLME  
DAGDKLHSAGKKLKSTDKDDVKDA AHRAGEK LKETGEEVQSGGIYDSIREKVSNAAKTV  
REKLDL

>PDF77N04

MSKDNNNPPEKEKYRGFASWPKEKIQEAGKKGGEARKEQLGLKGYIDMGRKGGMARSN  
AAAKGDPSTSDKSDKKDGKK

>PDT45G14

MSTEDKSYVEQAKDAAASAAETAKEYAQSA AETATQLATDLKNKVVG EKSTEDKAADKV  
KDAADATADKVSDMKDSAKDA A HKAGDKVKEAGNKIQNA

>PDT56F11

MSLKRVLIAEQRFLSTKSTKDSMKDSAASVAENAKEAAKNVAEKLQHAAAAARE
