# Supplementary material for: Molecular Analysis of the Cold Tolerant Antarctic Nematode, Panagrolaimus davidi
Source: PubMed Central journal article supplement (PMC4123951; doi:10.1371/journal.pone.0104526), 2014-08-06
Supplement: pone.0104526.s008.pdf [file pone.0104526.s008.pdf]

Sequence (partial) of HSP-70 and HSP-70-like genes in *P. davidi*

>group-1/5 (HSP-1)

MVNAIGIDLGTTYSCVGVFQNGKVEIANDQGNRTTPSYVAFTDTERIIGDGAKNQVAMNPHNTVFDKRLIG  
RKFDAAVQSDMKHWPFFKVISADGGRPKVQVEFKGETKEFFPEEISSMVLTKMKETAEAFLGQAVKDAVTV  
PAYFNDSQRQATKDAGAIAGLNLRIINEPTAAAIAYGLDKKGTGERNVLIFDLGGGTFDVSILTIEDGIFEVKST  
AGDTHLGGEDFDNRMVNHFVAEFKRKHKKDVASNPRALRRLRACERAKRTLSSSTQASIEIDSLFEGIDYYT  
SITRARFEELCADLFRNTMDPVEKALRDAKMDKAIHQHDIIVLVGGSTRIPKVQKLLSDFSGKELNKSINPDEAV  
AYGAAVQAAILSGDKSETVQDLLLLDVAPLSLGIETAGGVMTAIKRNNTVPTKTSQTFTTYADNQPGVLIQVFE  
GERAMTKDNLLGKFEELSGIPPAPRGVPQIEVTFDVEDANGILTVSAQDKSTGKKNITITNDKGRLSKEEIERM  
VQEAKEYKGEDEAQRDRVSAKNSLESYCFNMKQTVDEKVKDKISDDDRKKIVDKCAETLSWLDANQTAEK  
EEFEHHLKEIEAVCNPIITKMYQSAGGAPGGFPGGAPGAGGAPGAGGAGGPTIEEVD\*

>group-2 (HSP-3/4)

YNDKMRKAGVAVGVSDAGKKDKKYGTGDGTTYSCVGVYKNGRVANDGNRTSYVASATGDRGDAKNTTN  
NTVDAKRGRNDKTVADMKWKVTNKNKSHVNAVGNDRKASAMVTKMKASYGYKHAVTVAYNDARATKDA  
GTAGNVVRNTAAAAYGDKKDGNDVGGGTDVSTDNVAVATNGDTHGGDDRVMYKYYKKTGKDRKDRST  
KRRVKAKRASTHVKVVSMDGDSTTRAKNMDRGTKVVMADADKDVHVVGGSTRKKDYNGKSRGNDAVAY  
GAAVGGVSGDVTVDVNTMGTVGGVMTKTRNTVTKKSVSTAADNTVTVGRMTKDNHGKDTGARGVVTDVNG  
HVTADKGTGNKNKTTNDNRSDRMNDKADDDKVKVARNYSAYSKNGDKGGKSDKKTAVDTSWSNKATVDK  
HKKDGKVASKYAGTTGGDADAGSDDKD\*

>group-3 (HSP-6)

MLSTLRSLASTSRLASRNVYRFKSDIRGHVIGVDLGTNTSCVAVMEGKQAKVIENAEGIRTTTPSVVAFTKEGE  
RLVGAAAKRQAVTNSQNTLYATKRLIGRRFDDKEVQKDLKVVYPYKIVKAQNGDAWVEAQGVYSPSQVGAY  
VLMKMKETAESYLGPVHNAVTVPAYFNDSQRQATKDAGQIAGLNLRVINEPTAAALAYGLDKSDDKIIVY  
DLGGGTFDISILEIQKGVFEVKSTNGDITFLGGEDFDNHLVRFVLDTFKKEQGVDLTKDPMAMQVRVREAAKA  
KCELSSTTQTDINLPYITMDASGPKHMAKISRQFEKLVDDLKRTIEPCRKALHDAEVKASDIKEVLLVGGM  
SRMPKVQELVQQTFGRQPSKAVNPDEAVAMGAAIQGAVLAGNVTDVLLLDVTPLSLGIETLGGVMTKLITRNT  
TIPTKKSQVFSTAADGQTQVEIKVYQGERDMAAHNKILGQFSLVGIPPAPRGIPQVEVTFDIDANGIVNVSARD  
RGTGKEQQIVIQSSGGLSKDQIENMVREAEEKHAAEDAEEKELVETINQAESVVDHDTAKIKEYADQINQEEAK  
AIQEKLEALRTKLADKENLKAADVREELSQLQASLKLFEAAYKKMAEKNSANNADTSSSEPPKEEEEKKEEQ  
K\*

>group-4 (HSP-110-like)

MSIIGVNICYSTYVAGIKDGGVEVLANEYSHLPTPTSVSFNSTPRPMGYSSKQQAVPKFKSTCAHFTPLLCR  
TVEDHGPILDAIPCQVNAVNLNSDAKDLYSTVTVMDCKNQIPITFSIQQVLAFFTKLFTIAHADATRVHVEECLA  
IPYYLTVADRHVIMEAAQIAGFPFIKLINETAALASYAFFKKATLPAPPEAPKVVFDIGYSQAQIVLSEVHQLG  
AKVRYTKHSREVGFFFDAAIRGYFADEYKKTCLDARSNRRAWLRLADEAERAKKSVCAASTKTIAQIECL  
MEDTDFKAEIDRTLFEELAANVFQAFENLVSSFIAETKINPAEVEVELVGGSSRVPLVRSIVEKHFHGEAKTTM  
NQDEAIARGTALMAGLLSPVRKTAFTLEDFSPFTVFANYNERREQRSITLVTRGETIPVKNVTLFIPSVDIV  
YEESRTAKRPEFYHIANVLSRDPEPNPHSVEPTKFRFPFSYDLSHFILNNGCIRIDKELVPEEPKEPAKEEAP  
PAKDEKGDASMDQPPPEKTEKPAKEEAPPAPQPPQPRTRRETRVDHVLNINSGVNPVNVNQEYVTQENDM  
READAYAIQKAEAKNSLEAKFFDIQRTLEENADTFDATKKENLGQTMLQIEDFLYEDDADYKIEDYSNKLEELK  
KLFNEARLPLGLQIEEAPANAEAMDVEPQVEEPQ\*

>Group6 – no clear homology to *C. elegans*.

MAVAAERLALQNLRPSCNVLGLDGTNTVVAIWQAGKPSPEVLTVENNERIIPSYVWCKADGTYDVGRNPV  
RNLKQYPQDVCYDAKRMIGQNFTNLTKLQSDYWSFKIVNNGRPAVELSNGKKIEPEEISVQVLKAKAIADA  
YACANLEYAVITVPAYFDQNQKQATIDAAKRAGLTVLQLETEPTAAAFANFYDHKRFFDYNLFVFDLGGGTFDI  
TIISVKDGRFNVGACGGNNYLGGRDFDNLMLKDLRRRLEEKGAKKFENDVKQRIRLLALAETTKVALTTCDKE  
IVNCSDFIANATDKDGMFEITRAEFELAFQLKGLRDLACLEAMKRANLTSDEFANVLLIGGSSRMPMVSQLL  
NELFPQSFDISIFYQSKGLNPDEAVAYGAAIRAAQLDPNHRDYKPIENLLPIGIGIENQYSLMIPGGTKYPT  
KKKKRYFTTENNQQSASIIVYEGERILASENREILSFVVPNLPPGLAGDVYVDVTFVLDNNGLLTATGKSPTST  
AEGSVDYRQVRQAGKPIEQLLLELTLNAENDEQKKILINARVELRKNVENIRNRYENQKNIPLHKKRKHIDSCD  
EVIEWLDDNPDEPLDEERINLAKQIEKDAEELIDVRLMTI\*

>Group7-N Homology to F44E5.4/F44E5.5

MVFRVGIDPVFGYVYSYCNKYEKEIIDIKINNVYDGIKEVALMFEEIKSKIDGKLGYACIYLSRIYNNEIRKKFIEC  
GLKSGFKNVEIFNEETAFLYNAMSQINYKPLNGNVIWIKHFFEIFVWKNINQKAKFCGVWKADRSLNEFQNV  
DESKLNGADIVLCNTKIDESNLRKLSECQCFYFNFNWYWSKGSLLKARITAGDSELTHLETTCTFLTRTFILE  
IGNDVITSFEPPQQLPIRYTRTFMKNLKNDTLKVNYTPFELPEYSPIFLTFTINQNGIFSVTFDISK

>Group7-C

EGFQGKPLSKAVITVPAAFNEAQKNATLEAATIAGWKEIILLPEPIAAAFAYFNDRPISNNSNVLLFDLGGGTLD  
VCIFKIQNNQIEIISNTGDSKFGGRDFDTVLINYFKNVLSTKYGISFVKHKKYLLMVKQCQKIKETLSVMANAGLD  
VDDFDANQEGNIEISQEGFQKMCEVLLNKVKNLNSALHNSNFANQINKVLHVGGGSRMPMIKQLLRNMFL  
EAEHCIEEHPDEVAIGAAYYAYSLHSDF\*

>Group8-N homology to T14G8.3

MVLKPFTSICFSVLLLLVTFVTHAALAAMSIDFGSQFLKIGLVKPGIPMETVLNKEQSRKTANLIAFHNGERYF  
GELALQMSYKHPERVIPYVSDLIGKQYNNPIVQDYIKQYPYLNIEDPVRGTVIINTKDSGSDIETLVAMILWNA  
HEQAVVYGKTPIHDDVITVPSYLNQAERQCIVRATEIAGLTLQLMSDNGAAALNYAFTRRKEITEKAQNVLIFD  
IGASKTTATVVELKLAASNASKTLEPVVAVKGGIGYNRRLGGKILTYKLRDLLAEFEFTKHKHTS

>Group8-C

TPDDPKEPESKEEEPKEQQEPETAFFNETATNDTVKNQNETVTNGTESSPKKKEQKPKVIKAKLKVLYKYSFV  
DLNKENIKESKKILSTFEKVEKLAERDAAHNGIEARVYELKERLTNEDFTKFAQGNIEIENLTKILEETATWIEDE  
ADLSTTTEEFKRRAPIEEIVSAIEKRIRDLIEAELRKKAEAEAKKKAEEELAKKKAEEAEAKKKEEEALKAAAKEA  
EGGEEKPEGTEGGEEKVEGNEDTKEAAGNEEENEKATLDEEETPSVEDILLPKTDDKAHVDL\*

>Group9-N Possible group-1 ortholog

VCVEKLCDAITQSIEKEKDVLQRLSNFNIDYEATKSWILEAWSLLSRNENDMNLLAKTLSTINSLIETKEAEINTI  
SEKAETFILEGFVEMEDKSNELKIIWEEFIYLSQKNEKIETIQKFEKQKADISCFATSLIHRLNEVKSLNELQNF  
LNDMNQLRDNIISAEMLLNDHEIMKIDNYQEDIQNLQYLHTDLNEKTFNAAKEIFEFEKNDDFSTISNISQLYQY  
FDNFNAKHRLSSSKLELKR

>Group9-C

EEIASILLHMKNAEEFQGRGISTVVITIPASFTEKQKDATIVGGKLAGWQTINLLPEPVAAAFAYFIDRPLPEN  
SNILLDFDGGGLTDICIFQIKNSVFKITRNKGDANIGGRKFDNIIFEYFRNELLLKHEIDIEKNERKKYKMLQCQ  
NVKHNL SIRNDDQIHVDDYDSSKDGPPIMLTRQQFENLTEDLINDIKNLLKSATDDLQHPIEKVLHVGGSSRMP  
LIKKILQDLFPHAHCCIQQEPEEVAIGAAYSYHLAWKQTQTIQNREELKW

>Group10

DKSFQTFWRNRQSRQLQSFVNNKNGMYDDNWLKRMSKMPKFDIPEKFNFSNTGINAIGIDLGTSSCCVAVN  
RENRIEAVAITGERTLPSFVGYDEKDVKCGKVVVGNLGMYSKSTIFDTRKRVIGKTYAEVEIDPMWLFNVVED  
GESVKLEVQGYMNTILRQTPEEVTSELLNYMKQKAAEFQKKAVDNVVITIPASFTDNQKEATLKAAELAGLIHV  
HLLPEPVAAASITYFIDRRLPNDETILLFDLGGGLTDICIFEVNNFNFKIIRNTGDANIGGRNFDKLLYEYFKEELS  
RHGINVELKDTRKYKMLKQCQEIKHNL SALNDQRICVDDYGPSIDAPPIEITRQNFENMSVDFVNDIKILVKYAT  
DNLNPNIAKVLHVGGSSRMPLIKSMILQMFPAEQCEVHPPEEVAVGAAYSYHLAQQQK\*

>Group11-F

TSFVNRFLNLITVNTVNEQKPTFGQEFNLIFIGPTGAGKSMVLSIYNYLTYNFDEVSTAETVDCILPCHFQLO  
TPNFQTVVFTAGPQDVNEHFNDNGESVTQKPKVYSLKTEKYNCKVIDTPGLGDTRGAKQDEKNVDLIRNAIIE  
IEELHAICFVMPNSISKLTSNFEMNMRDLLSLFPKALTALKNVFFFFTYANSPFFTTIGDTRSSLEEFISTFEATNNA  
KIPFGIENVCVDSEAFMYFIGTQGHKYQNRDLESFRISWDKSKAAIENFLTLEDITPIKSNLDMTYEFEQV  
GTLQLETGKILEKL

>Group11-R

RGEIQQTATEVAAVLLKYMKEKAESFQGGKLSKAVITVPAAFTEAQEAATKKAIIAGWETVTLPEPIAASFAYF  
IDRPIPNNISILLFDLGGGLTDCVFKIISDQIQIISKNGDSKLGGRDFDNLMDFFSNKLNMDYDVSKLGNVNL  
PNLNKDNSETMVNLKDIRDKFKLLMESQKIKHNL SVHNEHDLDIGDIDPAKTGFIKISQQNFYDLSEDLLNKIQ  
NTILSALYKSGYKANEINQVLHVGGGCRMAMIKLLHEIFSSAKHWCEEHPDEVVAIGAAYYAYEIFSK

The remaining are derived from singleton EST sequences:

>Possible group-1 or group-1 ortholog

MAQDKIGTEKIKSAVITVPDHFVVGQKEATIHAAGLAGIENVKLITEPTAAAFAYGFDHKRFDGYNLFVFDLGGG  
TCDVSIVKVEKGEFKVIGHAGDTQLGGRXFDNHLIEYFDKHKHDLRVFESTDEIITKRKMRLREACEALKIALS  
HPAKASETIDLDDVAPGTPDEDLTYKQFKEIVANLTRRCRKLCFDALEETELKADDIDEVLLVGGSSKMRVIKD  
MLKEVXPTKELSEAINPDEAVAYGATLRAXQLXPXKXKXGXXXXLAIGIGVASAE

>PDF16F18F

AKNNFIFFIFQLNLFKCKLMQLELILAHRRRVLEYFKMAKLLKLMIMAILQLLCMLHSMVWVNMLEKKQKTRF  
LQIRKTQFLIFIALLVNLERMQFNLIQNIHRLFLGLMVILKLRWNIKMIQKDFQ

>PDF16F18R

DRTENIYNFLLLDVAPISFGIETAGGVMTPIIKRNTTVPTKTSVTFSTSVDNQPRVVLQVYEGERVMTKDNLL  
GSFELCGIRPAPRGVPTIEVTFNLYTDHLDVTAQDKLTGKSEILPITKLLSERKKIYVSDPDDPNLPAWPID  
PEDDITKP\*

>PDF20O10F

MMVIHVIGIDGLNGYIAAYNDITKEIIEFETAEVDHRDKSINKVHKICRKEIATFLEEFYACIYIPEYFPKEYRREFI  
NNGLQIGFKKVFITGKLVNIYLECFINSEEKPGSTGDIFWIFDRNKLVIWEKTERKSEIIQFGPNIFKDDITESDLLF  
YKLDGIDKPNIIFLDSNHQDCSETVKTIFPDCKYISHNSILSYCKSALLKARIAADDQDLDAEIKNCDINNF  
ENKIEIWIFXPSGNFDKDPILYLDAGQPLPEFKXMIIPVESXQKI

>PDF20O10R

PIPPNFNLLFDLGGGLTDLVCFKAENKLVIANNGDSNLGGSDFDMVLVQHFEKILETRYKIIMNEKNRYRLI  
QKCLDIKHTLSTESEASLDVSEINFEIDEFLTVTRQEFEQMASKLLDQIGDVLKQTFSKTDIFACDINKVLFVGG  
GCRMPMIQHFLRKRFPKAEXSCDENPDGMVAIGAAYSSFLMSKNDSSNCNIT\*

>PDF26D07

VTVFCFWLLYLILGMYGEDLFISFCDDKQKYGFAAAEDYRKNPNFVFDLIKMSMLPNSKIEADPSWGFTFTE  
NAENPLLIQFDNFDGNKKAASPAFLMAMLLKHHLKIKSEIGEKPKELGFWLLDKFKADEKERIKNGIKDACTLL  
KVSFVEVNV

>PDF40A16 Possible group-10 or group-10 ortholog

KFEKGIPYFKEIEEFDKISCEVKHFLNGFSIEEKFDNEMKKQESLAEIDCKIEQLVQIAKEVTEKEKNLAEYFYM  
NLHGKEMYLQCVENDDEKDEKSVEEKPSLLPIPSTIKLVSSAPNSTNEKYLPKLLKLYDDKINAVGIDLGTSR  
CCTAVNRNKNMETVALDNNGERPLPSYVSFDEKDEKCGKIVVDGLLKNLEKFTCFDIKRIIGKKYSNIIYDKSW  
PFTVIEKNGKIFVKTANSHGEITKTPEEISAVLLKYIKEVSTFQGKILTEAVLTVPAAFTEKQKEATLKAALAG  
WEKIHLLPEPVAASFAYFNNREIPNNSNVLLFDLGGGTLVDVCLFHINDGSLKIKSNGNTCLGGRDIDNLMMRH  
FTTALKFKYNINVNKKVKKKYQLLIECQNIKHNLVRESDLLPEKFDSGIEGGSIEIERCELEEMMTELIQRMK  
LIIETLENAMDHNEVNVKLLVGGGCRMPIVKTMLKNMFPNADQCCEEQPDEVVAVGAAYAYHLATTNERQ  
SEKVEIKKLL

>PDF40K18

TKMFSVLRLLAKSPIRLSQRNVEDIYPCAVTDHVIGVDLGTNTNTRVAVMKNGRKVIENEIGLRKTPSVVAFTEA  
GGRLIGAEAKRQAGSNPENTINGVKRIIGRKFQDVQKDLIDVPYKIVKAENGDAWIESRGIGYSPSQITAYLLM  
KMKEAAESYLGDYVHHAVITVPPYYSESQREAMYDAGKIAGLKVLRVTSEPGAALFAYGLVKGAREHSSKSE  
NGIFAIYDFGGGKFNISYEMQNGIGICESIFTDKTLGGEEFDNRLLCFLVDTFKMEEDIDLSDYPEAMQVRVREA  
AEKAKCDLSSVTETCINLPNIIIDASGFKHMIVKISREQFENLVDDLLERTIKLSEKAVVAVGFSSVKEILFIGGMS  
RMPKIQELLKKHFGRQPKKGINPEEVVVRGAAFHGAALSGKVPEFARH\*

>PDF43N17N

MYNYTASKASDDDIIDGELYEKRRIQMLRDEYIAIQKKTFTKWINSYLVRGGQDEISDLFVDIRDGTMLLKFL  
IYSTKLQRPSPKTRIHCCANINISLEFLRIRGIYYENLSSSEDIFDGKPTLILGLIWTIILRSVIEIPKEKSIDQKTIPS  
ATEIVLIWCQKMTADYEHVNIKNFTTSWRDGLAFNALIHHRPELIEYDSSLQSNNTIYNLQNALNVAEKYLGISK  
LFAEDATECPDNKLIFTYVSTYYNYF

>PDF43N17R

KNLNTAVITVPSEFSDKQKEATKMSAEYAGWQNIHFPEPLAAAYAYFSEIDMPENANILICDCGGGTVDICVGT  
VTTNELYVLCYVGDSDLGGRDFDNVLFTHFNIGILLHXYKIDVMQSSKYYLVRQKQCNIKHQLSAADKDWLDV  
DDFDCSINEVIQITKLEFEEMTTPLLVRIEEVIRRAVAQSNIAATDINYYVFQVGGGCRMPMLKLLLDTFPAANH  
QSSLYPDWIVAHGAALYAYYLKNNVAQNHSRKFLEW\*

>PDF52M24

QKQITIKAAKMAEWSPRLLPEPIAAAFAYFNNHEYEENSTLLFDLGGGTLDICLFKVINNSISIINQSGDSFLGG  
RDFDNLLFNYYFDRLEHEFGIIVRNDEKKKYKLLAECQKIKQYLSVRNEERLDVDEFAPDNGNTISITRKMFE  
RAKPLLFKIRTFITILKESGYQSSQISKILLVGGGCRMPMIKELLKNKFPDAKQCCEEQPPEEVVAVGAAMYAYH  
LMTTK

>PDF57M16F Possible group-1 or group-1 ortholog

GKEKKSVALSHDKSGILPNFVLKLLFSSLLSVAENIEKIHRMRFKFILLGDCASGKSSLLHRWIFNRFPERCLS  
TIGANFMNKEIDIYKNSVSLQIWDTASQERFKSSIAPFCRGVQCCILVFNLA VNDWGDSSIETLDEWLEFFRY  
ETQSPVVLIGNKVDKVDKESRSVSKKEVNLWCSKNNIKAYFEVSAKDGTNVDETLEEIAEAIYNSQANQYYY  
LNTGNEYYSVFEKEDNLMFNLLKKNFSDGLFNLENMQYHFPKSRTLIMDFLMLLE

>PDF57M16R\* Possible group-1 or group-1 ortholog

LIQKGYWKVYKSIDADKSWQFSITHYFNRAKIGIISDGETYKFPEEISAALLKHVKIKCEEIQGKELNETVITVP  
AMFDEIQNEATYAAALLAGWKEIHLLPEPVAAAFAYFIDKPIPSNSKLFDFLGGGTLDICIFKITGEKLEIIGRSG  
DPYLGGRDFDNILIEYFREQLLSKYGVTVAENKYYKLMKECQEIKHNLRLDDDKLAVEDYDLTKENDYIPITRI  
QFETLAKNLLMLIKSNITAALENAGVKSDEINKVLYVGGGSRMPIIKDLLHETFPNAEHCCEQNPDEVVAVGA  
AYYSYHLPSFKTNENRCSVILNLIYA

>PDF75P18F

MSNKTGIFAGIDLGNENSCIAIYKYEKTEVLAGADGSRITPSYVYIGENGEKHVKGAKNYGHKKPERLFYDIK  
RHLTMRSEGSSYKKTQWSIIDEAERKFGYFDYYIDGKFTYPMILAEIMKLLSYVGEDVEGVVLTVPAFFSTE  
QKNKILKAAEMAGITVLQLICEPTAAAIAYGMEHSYTNKCYLFTLEMDLSIYQLSKWLTKLTKLLFMVVILI

>PDF75P18R

NFKEMVFSYFPNFEREKEALKTAAAIAGFEDVTLDPISAFYAYMNGPNFNNQTLVFDLGGSSLELCVL  
KVNDKKIDILQTCSSLNVGGKYFDTVLENYLKEFLKLEKTEPYNLNIEKKQHRLKVDSTTIKEIFEYDTEYEYS  
FDNVVTASEEKIPITREKFENLSRDLLLEIQNTVNRTKHWKIDKVLQVGGGCRMSMIKRLQLTEFPNAQHLCH  
EFPEEVAIGAAYANNLLNATKYEMTIPQHNA\*

>PDF82N23

MSTSVALIGGGILVLLIAGYLAQRNNLIPPPTPKIVGIDLGTTFSSIGVYQAVTGETEILPDSLGRSIPSVVGF  
NGTVLIGTRAVEQQEHNPKNTIYDAKRFKTKSDNPQLMSDLKRYPFVVKLDSK GKAYFEVELDSGIRKVT  
PEEIGSLIKYLKEIANEKYQTTIPQLVISVPAEFDENQRNYTKKAAELAGLEVRRIVSEPTAAALAYGLHKKKV  
EYIVVFDLGGGTLVDSIIWLQGGVFVTQAMAGNNRLGGQDFNERTQKHLLIQVIEKTFNKNIVDKEDIQQLRLAI  
EEAKIRLTDVPVTNIRLQLRTVGEFNYQLTRNEFEELNKDLFDSIIDPIEAALADCNLKREDIDEIVLVGGSTRIPK  
VRQVVGSYFGKAPNFGIDPELAVVTGA AVQAGVIGGGWPLEVTAMELPTNRRKVHLYTHNSEA

>PDF88D19

REACEALKIALSHPAKASETIDLDDVAPGTPDEDLTYKQFKEIVANLTRRCRKLCFDALEETELKADDIDEVLLV  
GGSSKMRVIKDMLKEVFPTKELSEAINPDEAVAYGATLRAAQLLDPEKSKGFGIVDSLAIGIGVALAENRYHFLI  
KRNTPIPTKFGPETYSTVYNNQTAMTFNIYEGERLLADRNFHIMGFELQGLPKKRAEEVKATLELELDGNGILK  
AIAKGDGKEATQQVNHNEKKATGKKIEDMLADMEINCDRDREKDRTNAAARMEIIKTSI

>PDF90H19

LNAIGIDLGTSECCAFVIRNRNGPEGVVLDTVTNQRNMPSTVAINEMNLPCGQNVLNRMVTKSEYSAFDAKFL  
MGKELEEIVDPLWPFVEVISYCEEIYITFGDKSFPWIRNSVDISSCLLCHIKTKAEEFQGRMLEEAVITVPSSFTE  
GKDATIDAATYNSTWRLVKLLPEPVAALFAYFYETEIPNGSTVFLFDCGGGTTDICIAKIIGNKINILSEKGDPLF  
GGKNFDRILISYFNSVLNHKYGLNVLETNNKYRLMVKCQEIKHTLSVQTDADLFVDDFKTDENDVIPITREEFE  
CMAADLICHAKKLIVESLSKAGINPDEINIVFQAGGGCRMQMIKQMLRDMFPAQHQC SIHLEELVAKGAALY  
SYELKIERKIKERMFGK

>PDF96I08 possibly group-1 or group-1 ortholog

MMNKPKIIGIDLGTTFSCVGVFEYKCEIANGQGERTTPSVVGFIDGERPVGEYPKKKMYKYPNSNVISCVKR  
LIGRKFDDPNVQKDIPNLSYKVVSKAGNAAIEIENGKPKIYTPEEISAMILLDLKRTATKYLGCQMDDTIGAVITI  
PAYFNDSQRQATIDAAKIAGLNLVLRINEPTAAALAYGYRQKWKEGIIILVYNLGGGTFDVSIIKVTNGCCEVLAV  
DGDDHLGGEDFDNILVKYCIEEFRRKHGHDISNNRRAICRLKAVCEAAKRLCNC SHAPIEVENLFGGDDLNC  
KITVARFNQLSKELIEKTVELVKKVLEKAKLSKNDITNVLVGGSTRIPLIEKMLKEFFDQKNLNFDPINPDEAVAN  
GVTILAAHLSSSCFDTSVQNIKLLDVIPRSLGIRIEIDSIKNIFSVVIKRCRTRFPCEITKGFAAFYQTNADIDVYE  
GEDPVSDRNRLLSFVLRNISPAPIGRPKADVIFKIDENCILTVAVDQQNGNKDSIEILPDKGRLTESQIFEMIH  
EICPPPMEIDIEDD\*

>PDF98M19F

MALSAENLERFKLNPTGPAIGIDLGTNSCVGYFVNNNVEIITTAAGKRTVPSYVFYNNENEGCIIGEQAIAIRLK  
TNPNHVVYDSKRMIGLNYDDNVVNRNKSFWTFTVTKSDNNRPIYDIDKNHQVLPEEVSSEILKELIKMAQDKI  
GTEKIKSAVITVPDHFLVGQKEATIHAAGLAGIENVKLITEPTAAAFAYGFDHCRFDGYNLFDLGGGTCDVSI  
VKVEKGEFKVIGHAGDTQLGGRDFDNHLIEYFDKHKHDLRVFESTDEIITKRKMRLREACEALK

>PDF98M19R

FNKTMFKAMFRCLEETELKADDIDEVLLVGGSSKMRVIKDMLKEVFPTKELSEAINPDEAVAYGATLRAAQLLD  
PEKSKGFGIVDSLAIGIGVALAENRYHFLIKRNTPIPTKFGPETYSTVYNNQTAMTFNIYEGERLLADRNFHIMG  
FELQGLPKKRAEEVKATLELELDGNGILKAIKGDGKEATQQVNHNEKKATGKKIEDMLADMEINCDRDREKDR  
RTNAARMEIKNINFIKWDCEEKPKKPRAKELDGLLKECKEVEKWMSSNNAALTPEREQFEKIEKDAKRLLR  
SS\*
